# Supplementary material for: Innate and Adaptive Immune Genes Associated with MERS-CoV Infection in Dromedaries
Source: MDPI journal article supplement (doi:10.3390/cells10061291), 2021-05-23
Supplement: s1 [file s1]

# **Supplementary Materials for**

## **Innate and adaptive immune genes associated with MERS-CoV infection in dromedaries**

Sara Lado, Jean P. Elbers, Martin Plasil, Tom Loney, Pia Weidinger, Jeremy V. Camp, Jolanta Kolodziejek, Jan Futas, Dafalla O. Kannan, Pablo Orozco-terWengel, Petr Horin, Norbert Nowotny, Pamela A. Burger\*

\*Corresponding author. [pamela.burger@vetmeduni.ac.at](mailto:pamela.burger@vetmeduni.ac.at)

### **This PDF file includes:**

Figures S1 and S2

Tables S1 to S7

a) *Only livestock market samples*

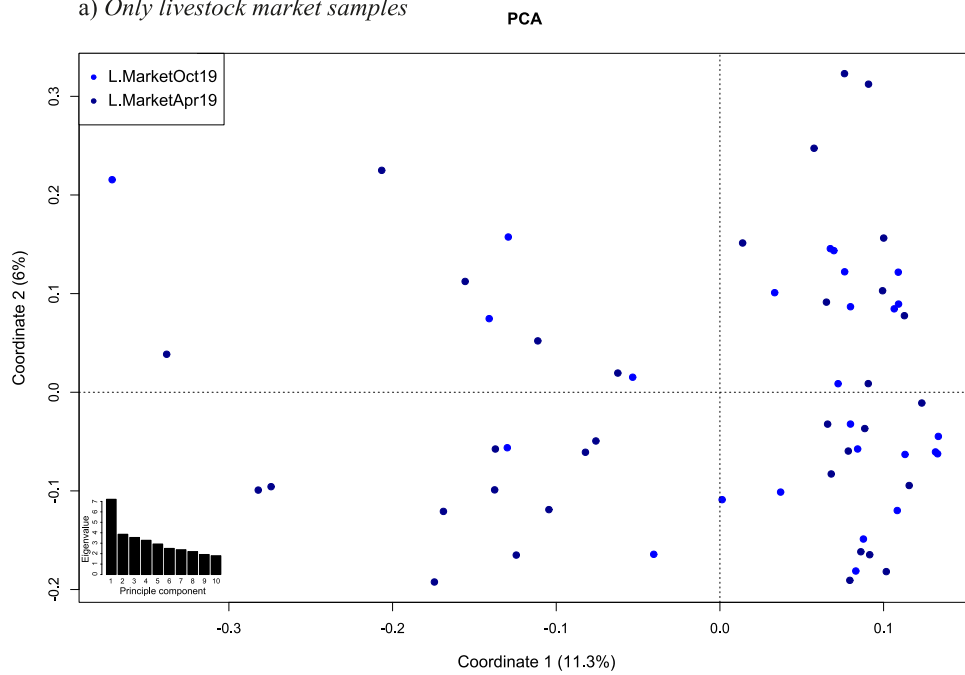

b) *Only spring field season*

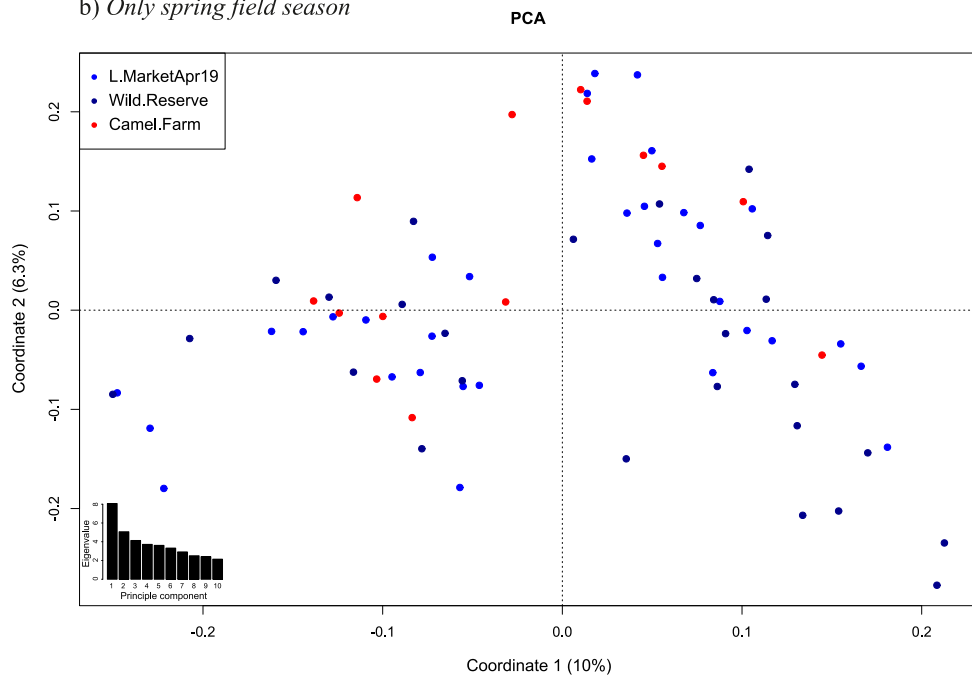

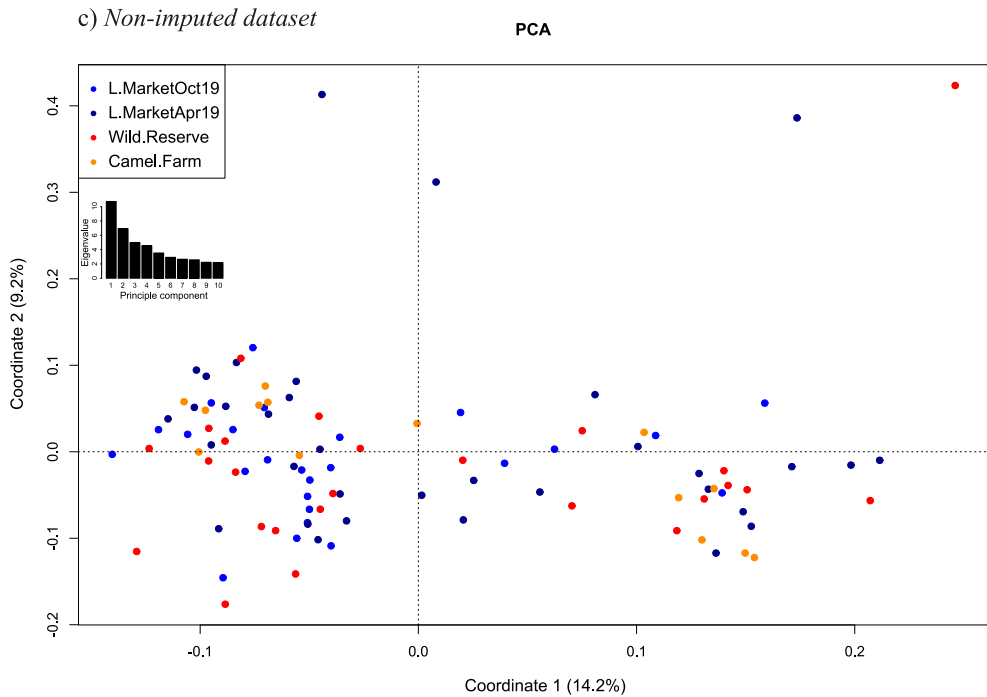

**Figure S1. Principal Component Analysis of the population structure at three collection sites over two sampling periods.** Variation explained by PC1 and PC2 are depicted in percentages. Individual animals are plotted on the first two principal components, colored by sampling site (livestock market [“L. Market”], over two sampling periods (April and October 2019, dark and light blue, respectively); Dubai Desert Conservation Reserve [“Wild. Reserve”], dark red; and a Bedouin camel farm [“Camel. Farm”], pink). The inset shows a barplot of the eigenvalues for the first 10 principal components. a) Only livestock market samples; b) Only spring field season: c) Non-imputed dataset.

a) PCA correction  
(six first PC)

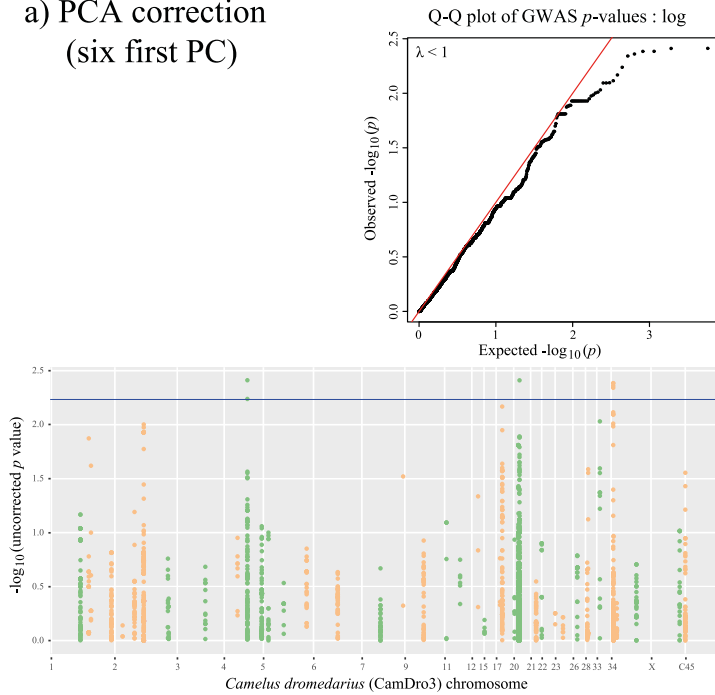

| Chr | Position  | Gene            | $p$ - value |
|-----|-----------|-----------------|-------------|
| 5   | 8508361   | <i>PTPN4</i>    | 0.0039      |
| 20  | 23100696  | <i>HLA-A-24</i> | 0.0039      |
| 34  | 15362634  | <i>MAGOHB</i>   | 0.0041      |
| 34  | 15363451  | <i>MAGOHB</i>   | 0.0041      |
| 34  | 15367780  | INTERGENIC      | 0.0044      |
| 34  | 15361800  | <i>MAGOHB</i>   | 0.0046      |
| 5   | 8506434   | <i>PTPN4</i>    | 0.0058      |
| 17  | 23840747  | <i>DNAH7</i>    | 0.0068      |
| 34  | 15371299  | INTERGENIC      | 0.0077      |
| 34  | 15363470  | <i>MAGOHB</i>   | 0.0080      |
| 34  | 15369030  | INTERGENIC      | 0.0080      |
| 34  | 15371264  | INTERGENIC      | 0.0080      |
| 33  | 12210072  | <i>IL10RA</i>   | 0.0093      |
| 34  | 15370956  | INTERGENIC      | 0.0098      |
| 2   | 113136710 | <i>CC2D2A</i>   | 0.0099      |
| 34  | 15371123  | INTERGENIC      | 0.0104      |

b) Only livestock market  
samples, with PCA  
correction  
(five first PC)

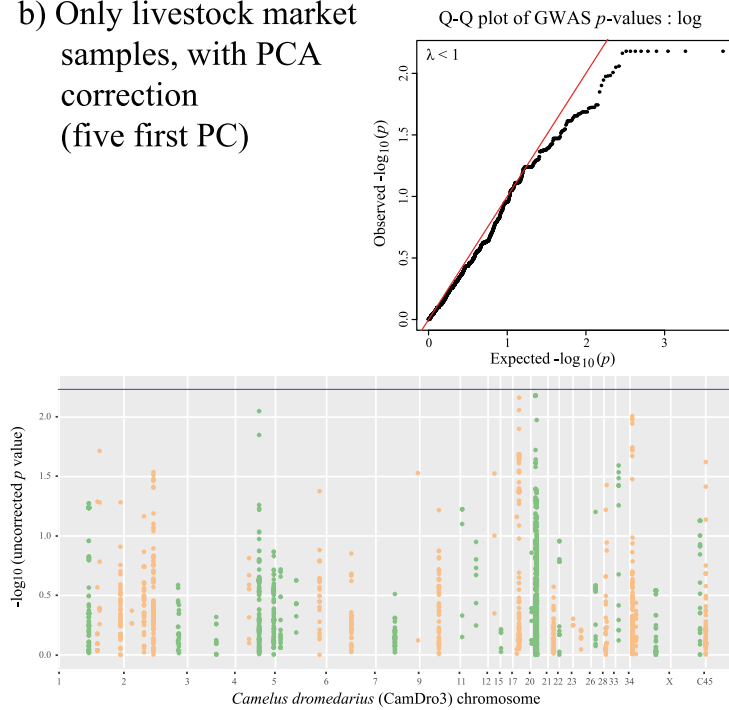

| Chr | Position | Gene            | $p$ - value |
|-----|----------|-----------------|-------------|
| 20  | 20676706 | <i>HLA-DPB1</i> | 0.0066      |
| 20  | 20677126 | <i>HLA-DPB1</i> | 0.0066      |
| 20  | 20678240 | <i>HLA-DPB1</i> | 0.0066      |
| 20  | 20679052 | <i>HLA-DPB1</i> | 0.0066      |
| 20  | 20679884 | <i>HLA-DPB1</i> | 0.0066      |
| 20  | 20680467 | <i>HLA-DPB1</i> | 0.0066      |
| 20  | 20680474 | <i>HLA-DPB1</i> | 0.0066      |
| 20  | 20680741 | <i>HLA-DPB1</i> | 0.0066      |
| 20  | 20681619 | <i>HLA-DPB1</i> | 0.0066      |
| 17  | 23963829 | <i>DNAH7</i>    | 0.0069      |
| 17  | 23948208 | <i>DNAH7</i>    | 0.0087      |
| 5   | 8508361  | <i>PTPN4</i>    | 0.0089      |
| 34  | 15363451 | <i>MAGOHB</i>   | 0.0098      |
| 34  | 15362634 | <i>MAGOHB</i>   | 0.0104      |
| 34  | 15367780 | INTERGENIC      | 0.0105      |
| 20  | 23100696 | <i>HLA-A-24</i> | 0.0106      |

c) Only samples from spring field season, with PCA correction (six first PC)

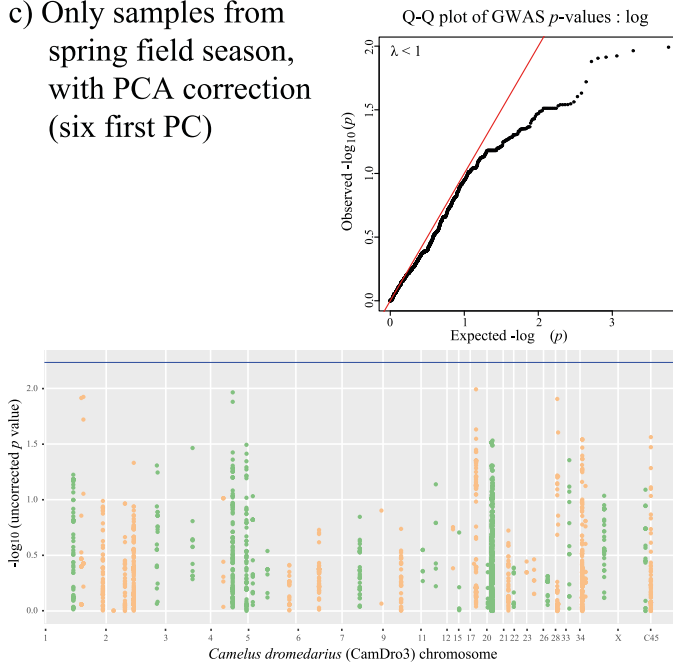

| Chr      | Position | Gene            | $p$ - value |
|----------|----------|-----------------|-------------|
| 17       | 23840747 | <b>DNAH7</b>    | 0.0102      |
| 5        | 8552273  | <b>PTPN4</b>    | 0.0109      |
| 2        | 9866197  | <i>RNF175</i>   | 0.0119      |
| 2        | 5565157  | <i>SUCLG1</i>   | 0.0122      |
| 28       | 8848388  | <i>IL1B</i>     | 0.0124      |
| 5        | 8544538  | <b>PTPN4</b>    | 0.0132      |
| 2        | 9865226  | <i>RNF175</i>   | 0.0191      |
| 17       | 23938277 | <b>DNAH7</b>    | 0.0234      |
| 28       | 10593199 | <i>NKL</i>      | 0.0249      |
| Contig45 | 334608   | <i>DDX58</i>    | 0.0274      |
| 17       | 23963829 | <b>DNAH7</b>    | 0.0284      |
| 34       | 15833750 | <i>KLRF1</i>    | 0.0288      |
| 34       | 15837599 | <i>KLRF1</i>    | 0.0288      |
| 34       | 15829311 | <i>KLRF1</i>    | 0.0288      |
| 34       | 15833105 | <i>KLRF1</i>    | 0.0288      |
| 20       | 23100696 | <b>HLA-A-24</b> | 0.0294      |

d) Non-imputed dataset (first four PC)

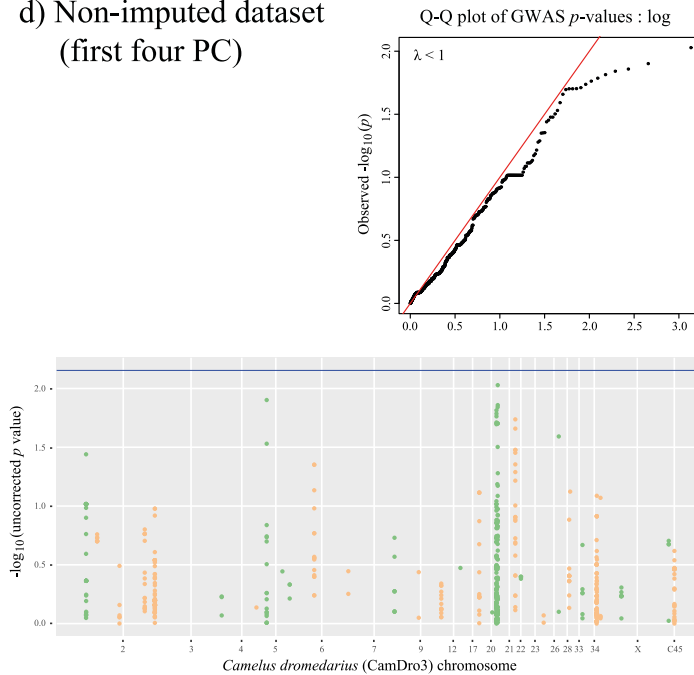

| Chr | Position | Gene            | $p$ -value |
|-----|----------|-----------------|------------|
| 20  | 23270291 | <i>HLA-A-30</i> | 0.0094     |
| 5   | 8543352  | <b>PTPN4</b>    | 0.0125     |
| 20  | 23268649 | <i>HLA-A-30</i> | 0.0139     |
| 20  | 23101810 | <b>HLA-A-24</b> | 0.0144     |
| 20  | 20959362 | <i>RT1-Bb</i>   | 0.0153     |
| 20  | 20959332 | <i>RT1-Bb</i>   | 0.0164     |
| 20  | 20959331 | <i>RT1-Bb</i>   | 0.0173     |
| 21  | 21448206 | <i>FCRL3</i>    | 0.0183     |
| 20  | 20959361 | <i>RT1-Bb</i>   | 0.0195     |
| 20  | 20959358 | <i>RT1-Bb</i>   | 0.0198     |
| 20  | 23270314 | <i>HLA-A-30</i> | 0.0199     |
| 20  | 23270316 | <i>HLA-A-30</i> | 0.0199     |
| 20  | 20866612 | <i>DLA</i>      | 0.0201     |
| 21  | 21453272 | <i>FCRL3</i>    | 0.0220     |
| 26  | 17219376 | <i>TLR3</i>     | 0.0256     |
| 5   | 8542959  | <b>PTPN4</b>    | 0.0295     |

**Figure S2. Manhattan and QQ plot.** Highlighted in bold are the four genes that are common in all analyses (*HLA-A-like*, *PTPN4*, *MAGOHB* and

*DNAH7*). FDR corrected thresholds are represented in blue. a) Total dataset; b) only livestock market samples; c) only spring field samples; d) non-imputed dataset. C45 corresponds to Contig45, an unplaced scaffold.

## Supplementary tables

**Table S1. Sample information assessment of virus presence (swabs) and antibody prevalence (sera).**

| No | Phenotype | Original code | Lab code | Sampling site & date                   | Sex (M/F) | Age (yr) | Chip ID         | Farm location (UAE) | Nasal Swabs                       | Camel serum samples    |                                        |                                     | Samples used in the association tests |
|----|-----------|---------------|----------|----------------------------------------|-----------|----------|-----------------|---------------------|-----------------------------------|------------------------|----------------------------------------|-------------------------------------|---------------------------------------|
|    |           |               |          |                                        |           |          |                 |                     | MERS CoV ORF1a RT-qPCR (ct value) | MERS CoV ORF1a RT-qPCR | Anti-MERS CoV ELISA (extinction ratio) | Anti-MERS-CoV-IIFT (antibody titer) |                                       |
| 1  | V- AB-    | 51            | Drom1508 | Livestock market, Oct 19               | F         | 2        | 985007841357609 | Marmoom             | neg.                              | neg.                   | borderline 1.1                         | 1:100                               |                                       |
| 2  | V- AB-    | 88            | Drom1545 | Livestock market, Oct 19               |           | 6 m      | NO CHIP INFO    |                     | neg.                              | neg.                   | borderline 0.9                         | 1:100                               |                                       |
| 3  | V- AB-    | NSB14         | Drom1831 | Livestock market, April 19             | M         | 2        | 900111881038113 | Al Saad             | neg.                              | neg..                  | borderline 1.02                        | ≥ 1:1,000                           |                                       |
| 4  | V- AB-    | M12           | Drom1940 | Bedouin farm, Al Mazrooei, March 19    | M         | 2 m      | NO CHIP INFO    |                     | neg.                              | neg.                   | borderline 1.00                        | 1:1,000                             |                                       |
| 5  | V- AB-    | NSw53         | Drom1903 | Wildlife Reserve, ArabAdv, April 19    | F         | 2        | NO CHIP INFO    |                     | neg.                              | neg.                   | neg. 0.07                              | neg.                                |                                       |
| 6  | V- AB-    | NSw54         | Drom1904 | Wildlife Reserve, ArabAdv, April 19    | M         | 6        | NO CHIP INFO    |                     | neg.                              | neg.                   | borderline 1.09                        | 1:100                               |                                       |
| 7  | V- AB-    | NSw57         | Drom1907 | Wildlife Reserve, DesertStar, April 19 | M         | 8-9      | NO CHIP INFO    |                     | neg.                              | neg.                   | neg. 0.64                              | 1:100                               |                                       |
| 8  | V- AB+    | 13            | Drom1470 | Livestock market, Oct 19               | F         | 1        | 784010050046584 | Abu Samra           | doubtful 39.6                     | neg.                   | pos. 4.0                               | ≥ 1:1,000                           |                                       |
| 9  | V- AB+    | 14            | Drom1471 | Livestock market, Oct 19               | F         | 6        | 992001000331305 |                     | neg.                              | neg.                   | pos. 3.4                               | ≥ 1:1,000                           | X                                     |
| 10 | V- AB+    | 25            | Drom1482 | Livestock market, Oct 19               | F         | 3        | 900057600121775 | Dubai               | doubtful 40.4                     | neg.                   | pos. 2.5                               | ≥ 1:1,000                           |                                       |
| 11 | V- AB+    | 31            | Drom1488 | Livestock market, Oct 19               | M         | 2        | 908182001493742 |                     | neg.                              | neg.                   | pos. 4.7                               | ≥ 1:1,000                           | X                                     |
| 12 | V- AB+    | 35            | Drom1492 | Livestock market, Oct 19               | F         | 6        | 900057600126791 | Malaghat            | neg.                              | neg.                   | pos. 4.8                               | ≥ 1:1,000                           | X                                     |
| 13 | V- AB+    | 37            | Drom1494 | Livestock market, Oct 19               | F         | 5        | 968000002916753 |                     | neg.                              | neg.                   | pos. 4.5                               | ≥ 1:1,000                           | X                                     |
| 14 | V- AB+    | 38            | Drom1495 | Livestock market, Oct 19               | M         | 6        | 985007841229562 | Al Wagan            | neg.                              | neg.                   | pos. 5.9                               | ≥ 1:1,000                           | X                                     |
| 15 | V- AB+    | 39            | Drom1496 | Livestock market, Oct 19               | F         | 6        | 784010050348103 |                     | neg.                              | neg.                   | pos. 4.1                               | ≥ 1:1,000                           | X                                     |
| 16 | V- AB+    | 42            | Drom1499 | Livestock market, Oct 19               | F         | 3        | 784019000006947 | Sweihan             | neg.                              | neg.                   | pos. 3.5                               | ≥ 1:1,000                           | X                                     |
| 17 | V- AB+    | 43            | Drom1500 | Livestock market, Oct 19               | F         | 6        | 985007841219484 | Marmoom             | neg.                              | neg.                   | pos. 4.8                               | ≥ 1:1,000                           | X                                     |
| 18 | V- AB+    | 47            | Drom1504 | Livestock market, Oct 19               | F         | 6        | 784010050073661 | Marakh              | neg.                              | neg.                   | pos. 5.1                               | ≥ 1:1,000                           | X                                     |

|    |        |       |          |                                     |   |     |                 |                                      |               |       |           |           |   |
|----|--------|-------|----------|-------------------------------------|---|-----|-----------------|--------------------------------------|---------------|-------|-----------|-----------|---|
| 19 | V- AB+ | 48    | Drom1505 | Livestock market, Oct 19            | F | 5   | 784019000006158 | Mezyad                               | neg.          | neg.  | pos. 3.2  | 1:1,000   | X |
| 20 | V- AB+ | 69    | Drom1526 | Livestock market, Oct 19            | F | 6   | 784010050079111 |                                      | neg.          | neg.  | pos. 4.6  | ≥ 1:1,000 | X |
| 21 | V- AB+ | 72    | Drom1529 | Livestock market, Oct 19            |   |     | 991001001739927 |                                      | neg.          | neg.  | pos. 4.2  | ≥ 1:1,000 |   |
| 22 | V- AB+ | 79    | Drom1536 | Livestock market, Oct 19            | F | 6   | 784010050079139 |                                      | neg.          | neg.  | pos. 4.4  | ≥ 1:1,000 | X |
| 23 | V- AB+ | 85    | Drom1542 | Livestock market, Oct 19            | F | 4   | 784010050140963 | Dubai                                | doubtful 39.8 | neg.  | pos. 3.5  | ≥ 1:1,000 |   |
| 24 | V- AB+ | NSB5  | Drom1823 | Livestock market, April 19          | M | 2   | 900111881038114 | Al Saad                              | neg.          | neg.. | pos. 2.39 | 1:1,000   | X |
| 25 | V- AB+ | NSB8  | Drom1826 | Livestock market, April 19          | M | 2   | 900111881038106 | Al Saad                              | neg.          | neg.. | pos. 1.74 | 1:1,000   | X |
| 26 | V- AB+ | NSB12 | Drom1829 | Livestock market, April 19          |   |     | NO CHIP INFO    |                                      | neg.          | neg.. | pos. 2.02 | 1:1,000   |   |
| 27 | V- AB+ | NSB13 | Drom1830 | Livestock market, April 19          | F | 4   | 784010050423283 | Bida Bint Saud / Bad' Bint<br>Sa'oud | neg.          | neg.. | pos. 3.49 | ≥ 1:1,000 | X |
| 28 | V- AB+ | NSB16 | Drom1833 | Livestock market, April 19          | F | 4-5 | 634078000075327 | Sweihaan                             | neg.          | neg.. | pos. 3.14 | ≥ 1:1,000 | X |
| 29 | V- AB+ | NSB17 | Drom1834 | Livestock market, April 19          | F | 8   | 784010050077291 | Bida Bint Saud / Bad' Bint<br>Sa'oud | neg.          | neg.. | pos. 4.09 | ≥ 1:1,000 | X |
| 30 | V- AB+ | NSB18 | Drom1835 | Livestock market, April 19          | F | 2   | 900182001414799 | Al Jabeeb                            | neg.          | neg.. | pos. 3.01 | ≥ 1:1,000 | X |
| 31 | V- AB+ | NSB19 | Drom1836 | Livestock market, April 19          | M | 1   | 991001002575031 | Marakh                               | neg.          | neg.. | pos. 5.10 | ≥ 1:1,000 | X |
| 32 | V- AB+ | NSB20 | Drom1837 | Livestock market, April 19          | M | 2   | 900111880935178 | Marakh                               | neg.          | neg.. | pos. 3.67 | ≥ 1:1,000 | X |
| 33 | V- AB+ | NSB21 | Drom1838 | Livestock market, April 19          | M | 3   | 985007841400429 | Zaid                                 | neg.          | neg.. | pos. 1.61 | ≥ 1:1,000 | X |
| 34 | V- AB+ | NSB41 | Drom1858 | Livestock market, April 19          | F | 4   | 985007841359958 |                                      | neg.          | neg.. | pos. 3.61 | 1:1,000   | X |
| 35 | V- AB+ | NSB42 | Drom1859 | Livestock market, April 19          | F | 4   | 784010050067053 | Al Kowah                             | neg.          | neg.. | pos. 4.14 | ≥ 1:1,000 | X |
| 36 | V- AB+ | NSB46 | Drom1863 | Livestock market, April 19          | F | 6   | 991001002575819 | Mulakat                              | neg.          | neg.. | pos. 4.46 | ≥ 1:1,000 | X |
| 37 | V- AB+ | M1    | Drom1929 | Bedouin farm, Al Mazrooei, March 19 | F | 4   | NO CHIP INFO    |                                      | neg.          | neg.  | pos. 3.84 | ≥ 1:1,000 | X |
| 38 | V- AB+ | M2    | Drom1930 | Bedouin farm, Al Mazrooei, March 19 | F | 4   | NO CHIP INFO    |                                      | neg.          | neg.  | pos. 3.96 | ≥ 1:1,000 | X |
| 39 | V- AB+ | M3    | Drom1931 | Bedouin farm, Al Mazrooei, March 19 | F | 4   | NO CHIP INFO    |                                      | neg.          | neg.  | pos. 2.01 | 1:1,000   | X |
| 40 | V- AB+ | M4    | Drom1932 | Bedouin farm, Al Mazrooei, March 19 | F | 15  | NO CHIP INFO    |                                      | neg.          | neg.  | pos. 1.35 | 1:1,000   | X |
| 41 | V- AB+ | M5    | Drom1933 | Bedouin farm, Al Mazrooei, March 19 | F | 8   | NO CHIP INFO    |                                      | neg.          | neg.  | pos. 4.06 | ≥ 1:1,000 | X |



|    |        |       |          |                                     |   |         |              |  |      |      |           |           |   |
|----|--------|-------|----------|-------------------------------------|---|---------|--------------|--|------|------|-----------|-----------|---|
| 42 | V- AB+ | M6    | Drom1934 | Bedouin farm, Al Mazrooei, March 19 | F | 25-30   | NO CHIP INFO |  | neg. | neg. | pos. 3.89 | ≥ 1:1,000 | X |
| 43 | V- AB+ | M7    | Drom1935 | Bedouin farm, Al Mazrooei, March 19 | F | 5       | NO CHIP INFO |  | neg. | neg. | pos. 4.17 | ≥ 1:1,000 | X |
| 44 | V- AB+ | M8    | Drom1936 | Bedouin farm, Al Mazrooei, March 19 | F | 12      | NO CHIP INFO |  | neg. | neg. | pos. 4.03 | ≥ 1:1,000 | X |
| 45 | V- AB+ | M9    | Drom1937 | Bedouin farm, Al Mazrooei, March 19 | F | 12      | NO CHIP INFO |  | neg. | neg. | pos. 2.89 | 1:1,000   | X |
| 46 | V- AB+ | M10   | Drom1938 | Bedouin farm, Al Mazrooei, March 19 | F | 12      | NO CHIP INFO |  | neg. | neg. | pos. 2.96 | ≥ 1:1,000 | X |
| 47 | V- AB+ | M11   | Drom1939 | Bedouin farm, Al Mazrooei, March 19 | F | 14      | NO CHIP INFO |  | neg. | neg. | pos. 2.91 | 1:1,000   | X |
| 48 | V- AB+ | M13   | Drom1941 | Bedouin farm, Al Mazrooei, March 19 | M | 10      | NO CHIP INFO |  | neg. | neg. | pos. 4.04 | ≥ 1:1,000 | X |
| 49 | V- AB+ | M14   | Drom1942 | Bedouin farm, Al Mazrooei, March 19 | M | 14      | NO CHIP INFO |  | neg. | neg. | pos. 4.11 | ≥ 1:1,000 | X |
| 50 | V- AB+ | M15   | Drom1943 | Bedouin farm, Al Mazrooei, March 19 | F | 10      | NO CHIP INFO |  | neg. | neg. | pos. 2.90 | ≥ 1:1,000 | X |
| 51 | V- AB+ | NSw20 | Drom1872 | Wildlife Reserve, Al Maha, April 19 | M | 15      | NO CHIP INFO |  | neg. | neg. | pos. 2.67 | 1:1,000   | X |
| 52 | V- AB+ | NSw21 | Drom1873 | Wildlife Reserve, Al Maha, April 19 | M | 13      | NO CHIP INFO |  | neg. | neg. | pos. 3.54 | ≥ 1:1,000 | X |
| 53 | V- AB+ | NSw22 | Drom1874 | Wildlife Reserve, Al Maha, April 19 | M | 17      | NO CHIP INFO |  | neg. | neg. | pos. 3.09 | 1:1,000   | X |
| 54 | V- AB+ | NSw23 | Drom1875 | Wildlife Reserve, Al Maha, April 19 | F | 14      | NO CHIP INFO |  | neg. | neg. | pos. 3.40 | 1:1,000   | X |
| 55 | V- AB+ | NSw25 | Drom1877 | Wildlife Reserve, Al Maha, April 19 | M | 9       | NO CHIP INFO |  | neg. | neg. | pos. 3.25 | 1:1,000   | X |
| 56 | V- AB+ | NSw26 | Drom1878 | Wildlife Reserve, Al Maha, April 19 | M | 7       | NO CHIP INFO |  | neg. | neg. | pos. 2.19 | ≥ 1:1,000 | X |
| 57 | V- AB+ | NSw27 | Drom1879 | Wildlife Reserve, Al Maha, April 19 | F | 5       | NO CHIP INFO |  | neg. | neg. | pos. 2.12 | 1:1,000   | X |
| 58 | V- AB+ | NSw30 | Drom1882 | Wildlife Reserve, Al Maha, April 19 | F | 14      | NO CHIP INFO |  | neg. | neg. | pos. 4.26 | ≥ 1:1,000 | X |
| 59 | V- AB+ | NSw32 | Drom1884 | Wildlife Reserve, Al Maha, April 19 | M | 12      | NO CHIP INFO |  | neg. | neg. | pos. 3.95 | ≥ 1:1,000 | X |
| 60 | V- AB+ | NSw34 | Drom1886 | Wildlife Reserve, Al Maha, April 19 | M | 7       | NO CHIP INFO |  | neg. | neg. | pos. 3.01 | 1:100     | X |
| 61 | V- AB+ | NSw35 | Drom1887 | Wildlife Reserve, Al Maha, April 19 | M | 2 y 1 m | NO CHIP INFO |  | neg. | neg. | pos. 1.87 | 1:1,000   | X |
| 62 | V- AB+ | NSw38 | Drom1890 | Wildlife Reserve, Alpha, April 19   | M | 15      | NO CHIP INFO |  | neg. | neg. | pos. 3.89 | 1:1,000   | X |
| 63 | V- AB+ | NSw40 | Drom1892 | Wildlife Reserve, Travco, April 19  | M | 12      | NO CHIP INFO |  | neg. | neg. | pos. 4.58 | ≥ 1:1,000 | X |
| 64 | V- AB+ | NSw42 | Drom1893 | Wildlife Reserve, Travco, April 19  | M | 9       | NO CHIP INFO |  | neg. | neg. | pos. 2.86 | 1:100     | X |
| 65 | V- AB+ | NSw43 | Drom1894 | Wildlife Reserve, ArabAdv, April 19 | F | 16      | NO CHIP INFO |  | neg. | neg. | pos. 4.42 | ≥ 1:1,000 | X |
| 66 | V- AB+ | NSw46 | Drom1897 | Wildlife Reserve, ArabAdv, April 19 | M | 16      | NO CHIP INFO |  | neg. | neg. | pos. 3.26 | ≥ 1:1,000 | X |

|    |        |       |          |                                        |   |     |                 |           |           |       |                |           |   |
|----|--------|-------|----------|----------------------------------------|---|-----|-----------------|-----------|-----------|-------|----------------|-----------|---|
| 67 | V- AB+ | NSw48 | Drom1899 | Wildlife Reserve, ArabAdv, April 19    | M | 12  | NO CHIP INFO    |           | neg.      | neg.  | pos. 4.55      | ≥ 1:1,000 | X |
| 68 | V- AB+ | NSw51 | Drom1901 | Wildlife Reserve, ArabAdv, April 19    | F | 16  | NO CHIP INFO    |           | neg.      | neg.  | pos. 2.76      | ≥ 1:1,000 | X |
| 69 | V- AB+ | NSw52 | Drom1902 | Wildlife Reserve, ArabAdv, April 19    | M | 11  | NO CHIP INFO    |           | neg.      | neg.  | pos. 3.24      | 1:1,000   | X |
| 70 | V- AB+ | NSw55 | Drom1905 | Wildlife Reserve, ArabAdv, April 19    | F | 18  | NO CHIP INFO    |           | neg.      | neg.  | pos. 3.37      | ≥ 1:1,000 | X |
| 71 | V- AB+ | NSw56 | Drom1906 | Wildlife Reserve, ArabAdv, April 19    | F | 6 m | NO CHIP INFO    |           | neg.      | neg.  | pos. 1.28      | 1:100     | X |
| 72 | V- AB+ | NSw59 | Drom1909 | Wildlife Reserve, DesertStar, April 19 | M | 5   | NO CHIP INFO    |           | neg.      | neg.  | pos. 2.13      | 1:1,000   | X |
| 73 | V- AB+ | NSw60 | Drom1910 | Wildlife Reserve, DesertStar, April 19 | M | 5   | NO CHIP INFO    |           | neg.      | neg.  | pos. 3.10      | 1:1,000   | X |
| 74 | V- AB+ | NSw63 | Drom1913 | Wildlife Reserve, DesertStar, April 19 | M | 15  | NO CHIP INFO    |           | neg.      | neg.  | pos. 2.35      | 1:1,000   | X |
| 75 | V- AB+ | NSw67 | Drom1917 | Wildlife Reserve, DesertStar, April 19 | M | 18  | NO CHIP INFO    |           | neg.      | neg.  | pos. 3.02      | 1:1,000   | X |
| 76 | V- AB+ | NSw69 | Drom1919 | Wildlife Reserve, DesertStar, April 19 | M | 18  | NO CHIP INFO    |           | neg.      | neg.  | pos. 3.34      | ≥ 1:1,000 | X |
| 77 | V- AB+ | NSw79 | Drom1928 | Wildlife Reserve, DesertStar, April 19 | M | 7   | NO CHIP INFO    |           | neg.      | neg.  | pos. 3.42      | 1:1,000   | X |
| 78 | V+ AB- | 2     | Drom1459 | Livestock market, Oct 19               | M | 4 m | NO CHIP INFO    |           | pos. 29.3 | neg.  | neg. 0.1       | neg.      |   |
| 79 | V+ AB- | 5     | Drom1462 | Livestock market, Oct 19               | M | 1   | 900057600126219 | Marakh    | pos. 19.9 | neg.  | neg. 0.1       | neg.      |   |
| 80 | V+ AB- | 6     | Drom1463 | Livestock market, Oct 19               | M | 3 m | NO CHIP INFO    |           | pos. 25.1 | neg.  | neg. 0.1       | neg.      |   |
| 81 | V+ AB- | 7     | Drom1464 | Livestock market, Oct 19               | M | 2 m | NO CHIP INFO    |           | pos. 34.2 | neg.  | neg. 0.5       | 1:100     |   |
| 82 | V+ AB- | 54    | Drom1511 | Livestock market, Oct 19               | M | 2   | 900057600121585 |           | pos. 33.4 | neg.  | borderline 0.9 | 1:1,000   |   |
| 83 | V+ AB- | 87    | Drom1544 | Livestock market, Oct 19               | M | 1   | 900057600121595 |           | Pos. 39.2 | neg.  | neg. 0.3       | 1:100     |   |
| 84 | V+ AB- | NSB40 | Drom1857 | Livestock market, April 19             |   | 2 m | NO CHIP INFO    |           | pos. 26.1 | neg.. | neg. 0.33      | 1:100     |   |
| 85 | V+ AB+ | 1     | Drom1458 | Livestock market, Oct 19               | M | 2   | 900182001697895 |           | pos. 34.8 | neg.  | pos. 3.6       | ≥ 1:1,000 | X |
| 86 | V+ AB+ | 3     | Drom1460 | Livestock market, Oct 19               | M | 2   | 900215000003532 |           | pos. 30.3 | neg.  | pos. 4.1       | ≥ 1:1,000 | X |
| 87 | V+ AB+ | 4     | Drom1461 | Livestock market, Oct 19               |   |     | 90011881027297  |           | pos. 36.7 | neg.  | pos. 1.9       | 1:1,000   |   |
| 88 | V+ AB+ | 8     | Drom1465 | Livestock market, Oct 19               | F | 3   | 900057600122200 | Abu Dhabi | pos. 36.2 | neg.  | pos. 5.0       | ≥ 1:1,000 | X |
| 89 | V+ AB+ | 9     | Drom1466 | Livestock market, Oct 19               | F | 3   | 900215000005008 | Abu Dhabi | pos. 36.8 | neg.  | pos. 5.3       | ≥ 1:1,000 | X |
| 90 | V+ AB+ | 10    | Drom1467 | Livestock market, Oct 19               | F | 5   | 985007841277728 | Marakh    | pos. 37.1 | neg.  | pos. 2.6       | ≥ 1:1,000 | X |
| 91 | V+ AB+ | 11    | Drom1468 | Livestock market, Oct 19               | F | 6   | 784010050031772 | Mulakat   | pos. 36.3 | neg.  | pos. 4.8       | ≥ 1:1,000 | X |

|     |        |       |          |                            |   |     |                 |                                 |           |      |           |           |   |
|-----|--------|-------|----------|----------------------------|---|-----|-----------------|---------------------------------|-----------|------|-----------|-----------|---|
| 92  | V+ AB+ | 23    | Drom1480 | Livestock market, Oct 19   | F | 6   | 784010050267117 |                                 | pos. 36.9 | neg. | pos. 4.5  | ≥ 1:1,000 | X |
| 93  | V+ AB+ | 27    | Drom1484 | Livestock market, Oct 19   | F | 6m  | 784010050465212 | Al Yahar                        | pos. 35.1 | neg. | pos. 5.0  | ≥ 1:1,000 | X |
| 94  | V+ AB+ | 28    | Drom1485 | Livestock market, Oct 19   | M | 5 m | NO CHIP INFO    |                                 | pos. 27.2 | neg. | pos. 4.5  | ≥ 1:1,000 | X |
| 95  | V+ AB+ | 29    | Drom1486 | Livestock market, Oct 19   | M | 6 m | NO CHIP INFO    |                                 | pos. 35.4 | neg. | pos. 1.8  | ≥ 1:1,000 | X |
| 96  | V+ AB+ | 32    | Drom1489 | Livestock market, Oct 19   | M | 2   | 991001002574519 |                                 | pos. 38.6 | neg. | pos. 4.0  | ≥ 1:1,000 | X |
| 97  | V+ AB+ | 45    | Drom1502 | Livestock market, Oct 19   | M | 5   | 985007841209387 | Khushaba                        | pos. 38.0 | neg. | pos. 4.6  | ≥ 1:1,000 | X |
| 98  | V+ AB+ | 56    | Drom1513 | Livestock market, Oct 19   | F | 2   | 784010050551133 | Jabib                           | pos. 36.1 | neg. | pos. 4.2  | ≥ 1:1,000 | X |
| 99  | V+ AB+ | 90    | Drom1547 | Livestock market, Oct 19   | F | 6   | 784010050294118 | Marakh                          | pos. 35.8 | neg. | pos. 4.3  | ≥ 1:1,000 | X |
| 100 | V+ AB+ | NSB10 | Drom1827 | Livestock market, April 19 | F | 2   | 784010050550508 | Seih Sabra/Sih Sabra/Seeh Sabra | pos. 38.2 | neg. | pos. 1.87 | 1:1,000   | X |
| 101 | V+ AB+ | NSB11 | Drom1828 | Livestock market, April 19 | M | 2   | 784010050550691 | Mezyad                          | pos. 34.9 | neg. | pos. 2.73 | 1:1,000   | X |
| 102 | V+ AB+ | NSB23 | Drom1840 | Livestock market, April 19 | M | 1   | 991001002570111 |                                 | pos. 32.6 | neg. | pos. 4.34 | ≥ 1:1,000 | X |
| 103 | V+ AB+ | NSB30 | Drom1847 | Livestock market, April 19 | F | 4   | 784010050229794 | Badr Zaid                       | pos. 39.5 | neg. | pos. 1.96 | 1:1,000   | X |
| 104 | V+ AB+ | NSB31 | Drom1848 | Livestock market, April 19 | F | 6   | 784010050243508 |                                 | pos. 39.0 | neg. | pos. 4.69 | ≥ 1:1,000 | X |
| 105 | V+ AB+ | NSB33 | Drom1850 | Livestock market, April 19 | M | 1-2 | 992001000330620 | Malaqāt                         | pos. 32.3 | neg. | pos. 4.67 | ≥ 1:1,000 | X |
| 106 | V+ AB+ | NSB34 | Drom1851 | Livestock market, April 19 | F | 2   | 991001002575035 |                                 | pos. 35.1 | neg. | pos. 4.44 | 1:1,000   | X |
| 107 | V+ AB+ | NSB35 | Drom1852 | Livestock market, April 19 | F | 3   | 991001002574462 | Sweihaan                        | pos. 33.4 | neg. | pos. 1.37 | 1:100     | X |
| 108 | V+ AB+ | NSB36 | Drom1853 | Livestock market, April 19 | M | 3   | 991001002575745 | Jebayeb                         | pos. 35.4 | neg. | pos. 1.33 | 1:100     | X |
| 109 | V+ AB+ | NSB37 | Drom1854 | Livestock market, April 19 | M | 2-3 | 992001000330472 | Al Saad                         | pos. 34.1 | neg. | pos. 1.84 | 1:100     | X |
| 110 | V+ AB+ | NSB38 | Drom1855 | Livestock market, April 19 | M | 3   | 991001002575920 |                                 | pos. 37.5 | neg. | pos. 4.02 | ≥ 1:1,000 | X |
| 111 | V+ AB+ | NSB39 | Drom1856 | Livestock market, April 19 | F | 6   | 784010050365484 | RAK                             | pos. 33.5 | neg. | pos. 4.67 | ≥ 1:1,000 | X |
| 112 | V+ AB+ | NSB43 | Drom1860 | Livestock market, April 19 | M | 1-2 | 992001000330719 | Marakh                          | pos. 37.4 | neg. | pos. 2.40 | 1:100     | X |
| 113 | V+ AB+ | NSB44 | Drom1861 | Livestock market, April 19 | F | 6   | 784010050516433 |                                 | pos. 37.5 | neg. | pos. 4.82 | ≥ 1:1,000 | X |
| 114 | V+ AB+ | NSB45 | Drom1862 | Livestock market, April 19 | F | 3   | 784010050028578 | Jabib – Al Faqa                 | pos. 38.9 | neg. | pos. 3.53 | ≥ 1:1,000 | X |
| 115 | V+ AB+ | NSB47 | Drom1864 | Livestock market, April 19 | M | 3   | 991001002575899 | Marmoon                         | pos. 35.2 | neg. | pos. 1.76 | 1:1,000   | X |
| 116 | V+ AB+ | NSB48 | Drom1865 | Livestock market, April 19 | M | 1-2 | 990001000053606 | Sweihaan                        | pos. 33.7 | neg. | pos. 4.82 | ≥ 1:1,000 | X |

|     |        |       |          |                            |   |     |                 |         |           |      |           |           |   |
|-----|--------|-------|----------|----------------------------|---|-----|-----------------|---------|-----------|------|-----------|-----------|---|
| 117 | V+ AB+ | NSB49 | Drom1866 | Livestock market, April 19 | F | 3   | 900111881038306 |         | pos. 36.1 | neg. | pos. 5.47 | ≥ 1:1,000 | X |
| 118 | V+ AB+ | NSB50 | Drom1867 | Livestock market, April 19 |   | 2m  | NO CHIP INFO    |         | pos. 38.5 | neg. | pos. 3.17 | 1:1,000   | X |
| 119 | V+ AB+ | NSB51 | Drom1868 | Livestock market, April 19 | M | 2   | 991001002574752 | RAK     | pos. 30.0 | neg. | pos. 2.04 | 1:1,000   | X |
| 120 | V+ AB+ | NSB52 | Drom1869 | Livestock market, April 19 | M | 1-2 | 900074001585559 | Shabiah | pos. 39.3 | neg. | pos. 4.91 | ≥ 1:1,000 | X |
| 121 | V+ AB+ | NSB54 | Drom1871 | Livestock market, April 19 | F | 5   | 784010050359111 |         | pos. 36.3 | neg. | pos. 3.89 | 1:1,000   | X |

**Table S2. Scheme showing how IIFT antibody titers were determined according to the fluorescence of the different sample dilutions.**

| Sample dilutions /<br>Fluorescent signal |          |          | Antibody Titer |
|------------------------------------------|----------|----------|----------------|
| 1:10                                     | 1:100    | 1:1,000  |                |
| weak                                     | negative | negative | 1:10           |
| moderate                                 | negative | negative | 1:10           |
| strong                                   | weak     | negative | 1:100          |
| strong                                   | moderate | negative | 1:100          |
| strong                                   | strong   | weak     | 1:1,000        |
| strong                                   | strong   | moderate | $\geq 1:1,000$ |
| strong                                   | strong   | strong   | $\geq 1:1,000$ |

**Table S3. Observed ( $H_O$ ) and expected ( $H_E$ ) heterozygosity values depicted in immune response gene groups. Identified candidate genes *MAGOHB*, *HLA-A-24*-like, *HLA-DPBI*-like, *DNAH7* and *PTPN4* are highlighted in bold.**

| Gene ID            | Genes-<br>No.SNPs | Genes-<br>$H_O$ | Genes-<br>$H_E$ | Exons-<br>No.SNPs | Exons-<br>$H_O$ | Exons- $H_E$ | Introns-<br>No.SNPs | Introns-<br>$H_O$ | Introns-<br>$H_E$ | Name                        | Description                                                                                         |
|--------------------|-------------------|-----------------|-----------------|-------------------|-----------------|--------------|---------------------|-------------------|-------------------|-----------------------------|-----------------------------------------------------------------------------------------------------|
| <b>Granzyme</b>    |                   |                 |                 |                   |                 |              |                     |                   |                   |                             |                                                                                                     |
| Cadr_00004168      | 4                 | 0.272           | 0.329           | 0                 | NA              | NA           | 4                   | 0.272             | 0.329             | <i>GZMA</i>                 | Granzyme A (Bos taurus OX=9913)                                                                     |
| Cadr_00004169      | 1                 | NA              | NA              | 0                 | NA              | NA           | 1                   | NA                | NA                | <i>GZMA</i>                 | Granzyme A (Homo sapiens OX=9606)                                                                   |
| Cadr_00005822      | 0                 | NA              | NA              | 0                 | NA              | NA           | 0                   | NA                | NA                | <i>GZMB</i>                 | Granzyme B (Homo sapiens OX=9606)                                                                   |
| Cadr_00005823      | 22                | 0.24            | 0.246           | 1                 | NA              | NA           | 22                  | 0.24              | 0.246             | <i>GZMB</i>                 | Granzyme B (Homo sapiens OX=9606)                                                                   |
| Cadr_00005821      | 5                 | 0.411           | 0.38            | 0                 | NA              | NA           | 5                   | 0.411             | 0.38              | <i>GZMH</i>                 | Granzyme H (Homo sapiens OX=9606)                                                                   |
| Cadr_00004167      | 6                 | 0.29            | 0.343           | 1                 | NA              | NA           | 5                   | 0.27              | 0.32              | <i>GZMK</i>                 | Granzyme K (Homo sapiens OX=9606)                                                                   |
| Cadr_00025032      | 16                | 0.246           | 0.255           | 3                 | 0.056           | 0.066        | 13                  | 0.289             | 0.299             | <i>GZMM</i>                 | Granzyme M (Homo sapiens OX=9606)                                                                   |
| <b>Mean</b>        |                   | <b>0.29</b>     | <b>0.31</b>     |                   | <b>0.06</b>     | <b>0.07</b>  |                     | <b>0.30</b>       | <b>0.31</b>       |                             |                                                                                                     |
| <b>Interleukin</b> |                   |                 |                 |                   |                 |              |                     |                   |                   |                             |                                                                                                     |
| Cadr_00001885      | 3                 | 0.423           | 0.484           | 0                 | NA              | NA           | 3                   | 0.423             | 0.484             | <i>CXCL8</i>                | Interleukin-8 (Canis lupus familiaris OX=9615)                                                      |
| Cadr_00023412      | 7                 | 0.197           | 0.197           | 2                 | 0.158           | 0.146        | 5                   | 0.213             | 0.217             | <i>IL10</i>                 | Interleukin-10 (Lama glama OX=9844)                                                                 |
| Cadr_00028914      | 14                | 0.201           | 0.228           | 11                | 0.187           | 0.22         | 9                   | 0.246             | 0.278             | <i>IL10RA</i>               | Interleukin-10 receptor subunit alpha (Homo sapiens OX=9606)                                        |
| Cadr_00001098      | 61                | 0.165           | 0.168           | 1                 | NA              | NA           | 61                  | 0.165             | 0.168             | <i>IL10RB</i>               | Interleukin-10 receptor subunit alpha (Homo sapiens OX=9606)                                        |
| Cadr_00029940      | 16                | 0.32            | 0.318           | 5                 | 0.19            | 0.188        | 11                  | 0.379             | 0.377             | <i>IL1A</i>                 | Interleukin-1 alpha (Lama glama OX=9844)                                                            |
| Cadr_00029941      | 20                | 0.285           | 0.308           | 2                 | 0.306           | 0.317        | 18                  | 0.283             | 0.307             | <i>IL1B</i>                 | Interleukin-1 beta (Lama glama OX=9844)                                                             |
| <b>Mean</b>        |                   | <b>0.27</b>     | <b>0.28</b>     |                   | <b>0.21</b>     | <b>0.22</b>  |                     | <b>0.28</b>       | <b>0.31</b>       |                             |                                                                                                     |
| <b>Killer cell</b> |                   |                 |                 |                   |                 |              |                     |                   |                   |                             |                                                                                                     |
| Cadr_00029273      | 19                | 0.277           | 0.295           | 3                 | 0.169           | 0.179        | 16                  | 0.297             | 0.317             | <i>Klra2</i>                | Killer cell lectin-like receptor 2 (Mus musculus OX=10090)                                          |
| Cadr_00029303      | 4                 | 0.229           | 0.22            | 0                 | NA              | NA           | 4                   | 0.229             | 0.22              | <i>KLRB1</i>                | Killer cell lectin-like receptor subfamily B member 1 (Homo sapiens OX=9606)                        |
| Cadr_00029300      | 2                 | 0.448           | 0.399           | 2                 | 0.448           | 0.399        | 0                   | NA                | NA                | <i>Klrb1b</i>               | Killer cell lectin-like receptor subfamily B member 1B allele A (Camelus bactrianus XP_010944886.1) |
| Cadr_00029489      | 18                | 0.348           | 0.389           | 1                 | NA              | NA           | 17                  | 0.344             | 0.382             | <i>KLRC2</i>                | NKG2-C type II integral membrane protein (Homo sapiens OX= 9606)                                    |
| Cadr_00029281      | 10                | 0.315           | 0.349           | 8                 | 0.289           | 0.323        | 7                   | 0.312             | 0.34              | <i>KLRD1</i>                | Natural killer cells antigen CD94 (Bos taurus OX=9913)                                              |
| Cadr_00029283      | 13                | 0.345           | 0.35            | 1                 | NA              | NA           | 12                  | 0.341             | 0.347             | <i>Klre1</i>                | Killer cell lectin-like receptor subfamily E member 1 (Mus musculus OX=10090)                       |
| Cadr_00029297      | 73                | 0.458           | 0.435           | 3                 | 0.374           | 0.367        | 70                  | 0.462             | 0.438             | <i>KLRF1</i>                | Killer cell lectin-like receptor subfamily F member 1 (Macaca fascicularis OX=9541)                 |
| Cadr_00029295      | 48                | 0.266           | 0.244           | 3                 | 0.294           | 0.261        | 47                  | 0.266             | 0.244             | <i>KLRF2</i>                | Killer cell lectin-like receptor subfamily F member 2 (Homo sapiens OX=9606)                        |
| Cadr_00008447      | 42                | 0.352           | 0.354           | 11                | 0.414           | 0.411        | 31                  | 0.33              | 0.334             | <i>Klrg2</i>                | Killer cell lectin-like receptor subfamily G member 2 (Mus musculus OX=10090)                       |
| Cadr_00029277      | 28                | 0.369           | 0.403           | 1                 | NA              | NA           | 28                  | 0.369             | 0.403             | <i>Klri1</i>                | Killer cell lectin-like receptor subfamily I member 1 (Mus musculus OX=10090)                       |
| Cadr_00029276      | 11                | 0.406           | 0.419           | 1                 | NA              | NA           | 11                  | 0.406             | 0.419             | <i>KLRK1</i>                | NKG2-D type II integral membrane protein (Pongo Pygmaeus OX=9600)                                   |
| Cadr_00029279      | 14                | 0.244           | 0.251           | 4                 | 0.248           | 0.254        | 10                  | 0.242             | 0.249             | <i>KLRK1</i>                | NKG2-D type II integral membrane protein (Sus scrofa OX=9823)                                       |
| <b>Mean</b>        |                   | <b>0.34</b>     | <b>0.34</b>     |                   | <b>0.32</b>     | <b>0.31</b>  |                     | <b>0.33</b>       | <b>0.34</b>       |                             |                                                                                                     |
| <b>MHC Class I</b> |                   |                 |                 |                   |                 |              |                     |                   |                   |                             |                                                                                                     |
| Cadr_00022140      | 112               | 0.09            | 0.116           | 15                | 0.061           | 0.067        | 97                  | 0.094             | 0.124             | <b><i>HLA-A-24-like</i></b> | HLA class I histocompatibility antigen, A-24 alpha chain (Homo sapiens OX=9606)                     |

|                     |     |             |             |    |             |             |     |             |             |                      |                                                                                       |
|---------------------|-----|-------------|-------------|----|-------------|-------------|-----|-------------|-------------|----------------------|---------------------------------------------------------------------------------------|
| Cadr_00022145       | 30  | 0.276       | 0.273       | 8  | 0.318       | 0.322       | 22  | 0.261       | 0.256       | <i>HLA-A-11</i>      | HLA class I histocompatibility antigen, A-11 alpha chain (Homo sapiens OX=9606)       |
| Cadr_00022149       | 14  | 0.216       | 0.279       | 12 | 0.22        | 0.285       | 5   | 0.181       | 0.215       | <i>HLA-A-69</i>      | HLA class I histocompatibility antigen, A-69 alpha chain (Homo sapiens OX=9606)       |
| Cadr_00022150       | 134 | 0.191       | 0.263       | 29 | 0.196       | 0.288       | 116 | 0.191       | 0.261       | <i>HLA-A-30</i>      | HLA class I histocompatibility antigen, A-30 alpha chain (Homo sapiens OX=9606)       |
| Cadr_00022148       | 20  | 0.225       | 0.329       | 10 | 0.21        | 0.301       | 10  | 0.241       | 0.357       | <i>HLA-C</i>         | HLA class I histocompatibility antigen, Cw-6 alpha chain (Homo sapiens OX=9606)       |
| Cadr_00022156       | 4   | 0.028       | 0.038       | 2  | 0.026       | 0.045       | 2   | 0.031       | 0.03        | <i>Patr</i>          | class I histocompatibility B-1 alpha chain (Fragment) (Pan troglodytes OX=9598)       |
| Cadr_00022105       | 18  | 0.197       | 0.187       | 10 | 0.203       | 0.188       | 8   | 0.191       | 0.184       | <i>Patr-A</i>        | Patr class I histocompatibility antigen, A-126 alpha chain (Pan troglodytes OX=9598)  |
| Cadr_00022139       | 67  | 0.315       | 0.318       | 3  | 0.239       | 0.241       | 64  | 0.318       | 0.322       | <i>Patr-A</i>        | Patr class I histocompatibility antigen, A-126 alpha chain (Pan troglodytes OX=9598)  |
| Cadr_00022147       | 5   | 0.02        | 0.032       | 4  | 0.025       | 0.035       | 1   | NA          | NA          | <i>Patr-A</i>        | Patr class I histocompatibility antigen, A-126 alpha chain (Pan troglodytes OX=9598)  |
| Cadr_00022160       | 31  | 0.047       | 0.09        | 3  | 0.048       | 0.075       | 28  | 0.047       | 0.092       | <i>Patr-A</i>        | Patr class I histocompatibility antigen, A-126 alpha chain (Pan troglodytes OX=9598)  |
| Cadr_00022155       | 0   | NA          | NA          | 0  | NA          | NA          | 0   | NA          | NA          | <i>Popy</i>          | class I histocompatibility antigen A-1 alpha chain (Pongo pygmaeus OX=9600)           |
| <b>Mean</b>         |     | <b>0.16</b> | <b>0.19</b> |    | <b>0.15</b> | <b>0.18</b> |     | <b>0.17</b> | <b>0.20</b> |                      |                                                                                       |
| <b>MHC Class II</b> |     |             |             |    |             |             |     |             |             |                      |                                                                                       |
| Cadr_00022027       | 28  | 0.35        | 0.343       | 2  | 0.48        | 0.45        | 26  | 0.339       | 0.334       | <i>BoLA-DQB</i>      | BoLa class II histocompatibility antigen, DQB*0101 beta chain (Bos taurus OX=9913)    |
| Cadr_00004894       | 11  | 0.324       | 0.299       | 2  | 0.397       | 0.378       | 9   | 0.307       | 0.281       | <i>CD74</i>          | HLA class II histocompatibility antigen gamma chain (Homo sapiens OX=9606)            |
| Cadr_00022030       | 95  | 0.412       | 0.402       | 37 | 0.437       | 0.416       | 58  | 0.396       | 0.393       | <i>DLA</i>           | class II histocompatibility antigen, DR-1 beta chain (Canis lupus familiaris OX=9615) |
| Cadr_00022020       | 5   | 0.27        | 0.307       | 2  | 0.21        | 0.245       | 3   | 0.31        | 0.348       | <i>HLA-DMA</i>       | HLA class II histocompatibility antigen, DM alpha chain (Homo sapiens OX=9606)        |
| Cadr_00022021       | 33  | 0.287       | 0.319       | 8  | 0.292       | 0.335       | 25  | 0.285       | 0.314       | <i>HLA-DMB</i>       | HLA class II histocompatibility antigen, DM alpha chain (Homo sapiens OX=9606)        |
| Cadr_00022018       | 25  | 0.27        | 0.295       | 17 | 0.268       | 0.293       | 8   | 0.274       | 0.3         | <i>HLA-DOA</i>       | HLA class II histocompatibility antigen, DO alpha chain (Homo sapiens OX=9606)        |
| Cadr_00022026       | 72  | 0.328       | 0.328       | 10 | 0.245       | 0.267       | 62  | 0.342       | 0.338       | <i>HLA-DOB</i>       | HLA class II histocompatibility antigen, DO alpha chain (Homo sapiens OX=9606)        |
| Cadr_00022017       | 32  | 0.274       | 0.296       | 5  | 0.253       | 0.274       | 27  | 0.278       | 0.3         | <i>HLA-DPA1</i>      | HLA class II histocompatibility antigen, DP alpha chain (Homo sapiens OX=9606)        |
| Cadr_00022016       | 41  | 0.273       | 0.331       | 9  | 0.253       | 0.307       | 32  | 0.279       | 0.338       | <i>HLA-DPB1-like</i> | HLA class II histocompatibility antigen, DP alpha chain (Homo sapiens OX=9606)        |
| Cadr_00022036       | 89  | 0.304       | 0.372       | 13 | 0.245       | 0.386       | 76  | 0.314       | 0.369       | <i>HLA-DRB1</i>      | HLA class II histocompatibility antigen, DRB1-4 alpha chain (Homo sapiens OX=9606)    |
| Cadr_00022037       | 63  | 0.414       | 0.43        | 6  | 0.32        | 0.318       | 57  | 0.424       | 0.442       | <i>HLA-DRB1</i>      | HLA class II histocompatibility antigen, DRB1-1 alpha chain (Homo sapiens OX=9606)    |
| Cadr_00022038       | 34  | 0.219       | 0.236       | 13 | 0.241       | 0.26        | 21  | 0.206       | 0.221       | <i>Mamu-DRA</i>      | Mamu class II histocompatibility antigen, DR alpha chain (Macaca mulatta OX=9544)     |
| Cadr_00022032       | 7   | 0.048       | 0.101       | 2  | 0           | 0.022       | 5   | 0.067       | 0.133       | <i>RT1-Bb</i>        | Rano class II histocompatibility antigen, B-1 beta chain (Rattus norvegicus OX=10116) |
| Cadr_00022034       | 36  | 0.172       | 0.202       | 2  | 0.304       | 0.266       | 34  | 0.164       | 0.198       | <i>RT1-Bb</i>        | Rano class II histocompatibility antigen, B-1 beta chain (Rattus norvegicus OX=10116) |
| Cadr_00022028       | 15  | 0.423       | 0.378       | 9  | 0.426       | 0.383       | 6   | 0.417       | 0.372       | <i>SLA</i>           | class II histocompatibility antigen, DQ haplotype D alpha chain (Sus scrofa =X=9823)  |
| Cadr_00022033       | 6   | 0.003       | 0.023       | 0  | NA          | NA          | 6   | 0.003       | 0.023       | <i>SLA</i>           | class II histocompatibility antigen, DQ haplotype D alpha chain (Sus scrofa =X=9823)  |
| Cadr_00022035       | 4   | 0.012       | 0.047       | 3  | 0.013       | 0.046       | 1   | NA          | NA          | <i>SLA</i>           | class II histocompatibility antigen, DQ haplotype D alpha chain (Sus scrofa =X=9823)  |
| <b>Mean</b>         |     | <b>0.26</b> | <b>0.28</b> |    | <b>0.27</b> | <b>0.29</b> |     | <b>0.28</b> | <b>0.29</b> |                      |                                                                                       |
| <b>TLR</b>          |     |             |             |    |             |             |     |             |             |                      |                                                                                       |
| Cadr_00002152       | 5   | 0.192       | 0.19        | 5  | 0.192       | 0.19        | 0   | NA          | NA          | <i>TLR1</i>          | Toll-like receptor 1 (Homo sapiens OX=9606)                                           |
| Cadr_00002153       | 23  | 0.274       | 0.304       | 16 | 0.291       | 0.317       | 9   | 0.222       | 0.256       | <i>TLR10</i>         | Toll-like receptor 10 (Bos taurus OX=9913)                                            |
| Cadr_00001385       | 10  | 0.398       | 0.437       | 10 | 0.398       | 0.437       | 3   | 0.355       | 0.363       | <i>TLR2</i>          | Toll-like receptor 2 (Equus caballus OX=9796)                                         |
| Cadr_00026583       | 31  | 0.384       | 0.398       | 6  | 0.24        | 0.253       | 25  | 0.419       | 0.433       | <i>TLR3</i>          | Toll-like receptor 3 (Boselaphus tragocamelus OX=9917)                                |
| Cadr_00016120       | 8   | 0.222       | 0.21        | 1  | NA          | NA          | 7   | 0.224       | 0.213       | <i>TLR4</i>          | Toll-like receptor 4 (Sus scrofa OX=9823)                                             |
| Cadr_00023195       | 4   | 0.453       | 0.46        | 4  | 0.453       | 0.46        | 0   | NA          | NA          | <i>TLR5</i>          | Toll-like receptor 5 (Homo sapiens OX=9606)                                           |
| Cadr_00002151       | 15  | 0.195       | 0.217       | 2  | 0.112       | 0.124       | 13  | 0.208       | 0.231       | <i>TLR6</i>          | Toll-like receptor 6 (Homo sapiens OX=9606)                                           |
| Cadr_00003728       | 18  | 0.186       | 0.376       | 1  | NA          | NA          | 17  | 0.186       | 0.37        | <i>TLR7</i>          | Toll-like receptor 7 (Homo sapiens OX=9606)                                           |
| Cadr_00003726       | 7   | 0.166       | 0.302       | 7  | 0.166       | 0.302       | 0   | NA          | NA          | <i>TLR8</i>          | Toll-like receptor 8 (Homo sapiens OX=9606)                                           |
| Cadr_00020415       | 3   | 0.088       | 0.083       | 3  | 0.088       | 0.083       | 0   | NA          | NA          | <i>TLR9</i>          | Toll-like receptor 9 (Sus scrofa OX=9823)                                             |

| Other IR      |     |             |             |    |             |             |     |             |             |                 |                                                                                                      |
|---------------|-----|-------------|-------------|----|-------------|-------------|-----|-------------|-------------|-----------------|------------------------------------------------------------------------------------------------------|
| Cadr_00030052 | 11  | 0.278       | 0.295       | 11 | 0.278       | 0.295       | 7   | 0.293       | 0.309       | <i>ACO1</i>     | Cytoplasmic aconitate hydratase (Bos taurus OX=9913)                                                 |
| Cadr_00020478 | 5   | 0.127       | 0.135       | 5  | 0.127       | 0.135       | 5   | 0.127       | 0.135       | <i>APPL1</i>    | DCC-interacting protein 13-alpha (Homo sapiens OX=9606)                                              |
| Cadr_00002239 | 297 | 0.17        | 0.171       | 66 | 0.248       | 0.251       | 239 | 0.149       | 0.15        | <i>CC2D2A</i>   | Coiled-coil and C2 domain-containing protein 2A (Homo sapiens OX=9606)                               |
| Cadr_00029296 | 27  | 0.335       | 0.316       | 2  | 0.319       | 0.284       | 27  | 0.335       | 0.316       | <i>CLEC2B</i>   | C-type lectin domain family 2 member B (Homo sapiens OX=9606)                                        |
| Cadr_00007342 | 11  | 0.226       | 0.215       | 4  | 0.282       | 0.267       | 7   | 0.194       | 0.184       | <i>CXCR2</i>    | C-X-C chemokine receptor type 2 (Bos taurus OX=9913)                                                 |
| Cadr_00030053 | 90  | 0.284       | 0.312       | 11 | 0.278       | 0.295       | 86  | 0.286       | 0.314       | <i>DDX58</i>    | Probable ATP-dependent RNA helicase DDX58 (Sus scrofa OX=9823)                                       |
| Cadr_00020479 | 129 | 0.269       | 0.28        | 15 | 0.251       | 0.261       | 120 | 0.264       | 0.276       | <i>DNAH7</i>    | Dynein heavy chain 7 axonemal (Homo sapiens OX=9607)                                                 |
| Cadr_00006877 | 64  | 0.169       | 0.176       | 1  | NA          | NA          | 63  | 0.169       | 0.176       | <i>DPP4</i>     | Dipeptidyl peptidase 4 (Bos taurus OX=9913)                                                          |
| Cadr_00012213 | 12  | 0.352       | 0.352       | 4  | 0.425       | 0.443       | 8   | 0.316       | 0.307       | <i>FCAR</i>     | Immunoglobulin alpha Fc receptor (Homo sapiens OX=9606)                                              |
| Cadr_00024638 | 47  | 0.292       | 0.306       | 16 | 0.319       | 0.343       | 36  | 0.296       | 0.31        | <i>FCRL3</i>    | Fc receptor-like protein 3 (Homo sapiens OX=9606)                                                    |
| Cadr_00011189 | 2   | 0.291       | 0.275       | 1  | NA          | NA          | 1   | NA          | NA          | <i>HP</i>       | Haptoglobin (Sus scrofa OX=9823)                                                                     |
| Cadr_00006880 | 29  | 0.17        | 0.201       | 1  | NA          | NA          | 28  | 0.162       | 0.193       | <i>IFIH1</i>    | Interferon-induced helicase C domain-containing protein 1 (Homo sapiens OX=9606)                     |
| Cadr_00015578 | 0   | NA          | NA          | 0  | NA          | NA          | 0   | NA          | NA          | <i>IFNB2</i>    | Interferon beta-2 (Bos taurus OX=9913)                                                               |
| Cadr_00017035 | 3   | 0.177       | 0.205       | 0  | NA          | NA          | 3   | 0.177       | 0.205       | <i>IFNG</i>     | Interferon gamma (Camelus bactrianus OX=9837)                                                        |
| Cadr_00001103 | 50  | 0.279       | 0.258       | 0  | NA          | NA          | 50  | 0.279       | 0.258       | <i>IFNGR2</i>   | Interferon gamma receptor 2 (Homo sapiens OX=9606)                                                   |
| Cadr_00029272 | 12  | 0.26        | 0.279       | 4  | 0.126       | 0.129       | 8   | 0.327       | 0.355       | <i>MAGOHB</i>   | Protein mago nashi homolog 2 (Bos taurus OX=9913)                                                    |
| Cadr_00004186 | 13  | 0.241       | 0.256       | 3  | 0.293       | 0.316       | 10  | 0.226       | 0.238       | <i>MAP3K1</i>   | Mitogen-activated protein kinase kinase kinase 1 (Homo sapiens OX=9606)                              |
| Cadr_00005819 | 1   | NA          | NA          | 0  | NA          | NA          | 1   | NA          | NA          | <i>Mast</i>     | cell protease 3 (Ovis aries OX=9940)                                                                 |
| Cadr_00012215 | 15  | 0.306       | 0.354       | 3  | 0.334       | 0.391       | 12  | 0.299       | 0.345       | <i>NCR1</i>     | Natural cytotoxicity triggering receptor 1 (Bos taurus OX=9913)                                      |
| Cadr_00021869 | 9   | 0.174       | 0.186       | 3  | 0.099       | 0.095       | 6   | 0.212       | 0.232       | <i>NCR2</i>     | Natural cytotoxicity triggering receptor 2 (Homo sapiens OX=9606)                                    |
| Cadr_00001692 | 77  | 0.266       | 0.254       | 2  | 0.243       | 0.248       | 75  | 0.267       | 0.254       | <i>NFKB1</i>    | Nuclear factor NF-kappa-B p105 subunit (Canis lupus familiaris OX=9615)                              |
| Cadr_00009474 | 6   | 0.273       | 0.27        | 2  | 0.352       | 0.34        | 4   | 0.234       | 0.235       | <i>NFKB2</i>    | Nuclear factor NF-kappa-B p100 subunit (Homo sapiens OX=9606)                                        |
| Cadr_00029278 | 15  | 0.426       | 0.47        | 2  | 0.45        | 0.503       | 13  | 0.422       | 0.465       | <i>NKG2A</i>    | NKG2-A/NKG2-B type II integral membrane protein (Macaca mulatta OX=9544)                             |
| Cadr_00029993 | 12  | 0.087       | 0.098       | 1  | NA          | NA          | 11  | 0.093       | 0.102       | <i>NKL</i>      | Antimicrobial peptide NK-lysin (Fragment) (Sus scrofa OX=9823)                                       |
| Cadr_00009139 | 6   | 0.371       | 0.378       | 5  | 0.348       | 0.357       | 1   | NA          | NA          | <i>PRF1</i>     | Perforin-1 (Homo sapiens OX=9606)                                                                    |
| Cadr_00007027 | 22  | 0.243       | 0.239       | 3  | 0.272       | 0.273       | 20  | 0.244       | 0.238       | <i>PRKRA</i>    | Interferon-inducible double-stranded RNA dependent protein kinase activator A (Homo sapiens OX=9606) |
| Cadr_00009475 | 0   | NA          | NA          | 0  | NA          | NA          | 0   | NA          | NA          | <i>Psd</i>      | PH and SEC7 domain-containing protein 1 (Mus musculus OX=10090)                                      |
| Cadr_00024639 | 2   | 0.399       | 0.432       | 2  | 0.399       | 0.432       | 2   | 0.399       | 0.432       | <i>PTMA</i>     | Prothymosin alpha (Pongo abelii OX=9601)                                                             |
| Cadr_00006681 | 163 | 0.213       | 0.222       | 17 | 0.299       | 0.318       | 153 | 0.207       | 0.215       | <i>PTPN4</i>    | Tyrosine-protein phosphatase non-receptor type 4 (Homo sapiens OX=9606)                              |
| Cadr_00001384 | 10  | 0.398       | 0.437       | 10 | 0.398       | 0.437       | 3   | 0.355       | 0.363       | <i>RNF175</i>   | RING finger protein 175 (Homo sapiens OX=9606)                                                       |
| Cadr_00004895 | 4   | 0.333       | 0.3         | 0  | NA          | NA          | 4   | 0.333       | 0.3         | <i>Rps14</i>    | 40S ribosomal protein S14 (Mus musculus OX=10090)                                                    |
| Cadr_00017710 | 6   | 0.41        | 0.45        | 2  | 0.335       | 0.386       | 4   | 0.448       | 0.481       | <i>Rps7</i>     | 40S ribosomal protein S7 (Rattus norvegicus OX=10116)                                                |
| Cadr_00001327 | 32  | 0.275       | 0.273       | 14 | 0.26        | 0.259       | 18  | 0.287       | 0.284       | <i>Suclg1</i>   | Succinate--CoA ligase [ADP/GDP-forming] subunit alpha, mitochondrial (Mus musculus OX=10090)         |
| Cadr_00002785 | 18  | 0.132       | 0.265       | 1  | NA          | NA          | 17  | 0.131       | 0.261       | <i>Tmem255a</i> | Transmembrane protein 255A (Mus musculus OX=10090)                                                   |
| Cadr_00022101 | 7   | 0.188       | 0.178       | 4  | 0.226       | 0.211       | 3   | 0.138       | 0.134       | <i>TNF</i>      | Tumor necrosis factor (Camelus bactrianus OX=9837)                                                   |
| Cadr_00006503 | 45  | 0.372       | 0.4         | 19 | 0.365       | 0.393       | 29  | 0.377       | 0.407       | <i>Traf3</i>    | TNF receptor-associated factor 3 (Mus musculus OX=10090)                                             |
| Cadr_00011190 | 1   | NA          | NA          | 1  | NA          | NA          | 0   | NA          | NA          | <i>TXNL4B</i>   | Thioredoxin-like protein 4B (Homo sapiens OX=9606)                                                   |
| <b>Mean</b>   |     | <b>0.27</b> | <b>0.28</b> |    | <b>0.29</b> | <b>0.31</b> |     | <b>0.26</b> | <b>0.27</b> |                 |                                                                                                      |



**Table S4. Read-based imputation performance.** nAncestralHaplotypes (k) = number of ancestral haplotypes; nGen = number of generations ago, controls recombination rate; nDiff\_from\_non-imputed = number of genotypes that were not the same between imputed and non-imputed samples; nMatch\_from\_non-imputed = number of genotypes that were the same between imputed and non-imputed sample; nMissing\_from\_non-imputed = these are SNPs and hence genotypes that are missing because that SNP failed QC for imputation; nAdditional\_SNPs\_with\_called\_genotypes\_from\_non-imputed = these are genotypes newly added by imputation).

| nAncestralHaplotypes | nGen   | nDiff_from_non-imputed | nMatch_from_non-imputed | nMissing_from_non-imputed | nAdditional_SNPs_with_called_genotypes_from_non-imputed |
|----------------------|--------|------------------------|-------------------------|---------------------------|---------------------------------------------------------|
| 14                   | 100000 | 36                     | 1767                    | 356                       | 3057                                                    |
| 8                    | 1000   | 52                     | 1765                    | 342                       | 3015                                                    |
| 8                    | 10000  | 37                     | 1765                    | 357                       | 3010                                                    |
| 8                    | 100000 | 33                     | 1757                    | 369                       | 2977                                                    |
| 10                   | 100000 | 35                     | 1753                    | 371                       | 3013                                                    |
| 10                   | 10000  | 35                     | 1752                    | 372                       | 3035                                                    |
| 14                   | 1000   | 41                     | 1748                    | 370                       | 3077                                                    |
| 10                   | 1000   | 43                     | 1741                    | 375                       | 3060                                                    |
| 12                   | 10000  | 39                     | 1741                    | 379                       | 3052                                                    |
| 14                   | 10000  | 46                     | 1739                    | 374                       | 3044                                                    |
| 12                   | 100000 | 34                     | 1722                    | 403                       | 3041                                                    |
| 6                    | 100000 | 48                     | 1721                    | 390                       | 2903                                                    |
| 12                   | 1000   | 48                     | 1715                    | 396                       | 3092                                                    |
| 14                   | 100    | 46                     | 1707                    | 406                       | 3197                                                    |
| 6                    | 1000   | 43                     | 1698                    | 418                       | 2977                                                    |
| 10                   | 100    | 48                     | 1693                    | 418                       | 3102                                                    |
| 6                    | 10000  | 42                     | 1685                    | 432                       | 2952                                                    |

|    |        |     |      |     |      |
|----|--------|-----|------|-----|------|
| 6  | 100    | 65  | 1683 | 411 | 3031 |
| 8  | 100    | 53  | 1673 | 433 | 3079 |
| 12 | 100    | 53  | 1671 | 435 | 3122 |
| 4  | 1000   | 58  | 1659 | 442 | 2742 |
| 4  | 10000  | 69  | 1630 | 460 | 2772 |
| 4  | 100    | 103 | 1615 | 441 | 2776 |
| 4  | 100000 | 71  | 1581 | 507 | 2715 |

**Table S5 Statistical analysis of observed heterozygosity ( $H_o$ ) for immune response gene groups in genes, exons and introns.** Means and standard deviations are shown for genes, exon and introns separately. Results are only presented for gene, intron and exon  $H_o$  as only these showed significance for both ANOVA and posthoc correction with Benjamini-Hochberg (BH). Gene groups with different letters ('a' and 'b') indicate groups that had significantly different means whilst the same letters indicate non-significant different means.

**Gene  $H_o$**

| Granzyme | Interleukin | Killer_Cell | MHC_I | MHC_II | TLR | Other_IR |
|----------|-------------|-------------|-------|--------|-----|----------|
| ab       | ab          | a           | b     | ab     | ab  | ab       |

|   | Group       | $H_o$ mean | St. Deviation |
|---|-------------|------------|---------------|
| 1 | Granzyme    | 0.292      | 0.070         |
| 2 | Interleukin | 0.265      | 0.097         |
| 3 | Killer_Cell | 0.338      | 0.075         |
| 4 | MHC_I       | 0.161      | 0.106         |
| 5 | MHC_II      | 0.258      | 0.131         |
| 6 | TLR         | 0.256      | 0.118         |
| 7 | Other_IR    | 0.266      | 0.088         |

**Exon  $H_o$**

| Granzyme | Interleukin | Killer_Cell | MHC_I | MHC_II | TLR | Other_IR |
|----------|-------------|-------------|-------|--------|-----|----------|
| ab       | ab          | a           | b     | ab     | ab  | b        |

|   | Group       | $H_o$ mean | St. Deviation |
|---|-------------|------------|---------------|
| 1 | Granzyme    | 0.056      | NA            |
| 2 | Interleukin | 0.210      | 0.065         |
| 3 | Killer_Cell | 0.319      | 0.098         |
| 4 | MHC_I       | 0.155      | 0.105         |
| 5 | MHC_II      | 0.274      | 0.132         |
| 6 | TLR         | 0.243      | 0.131         |
| 7 | Other_IR    | 0.293      | 0.088         |

**Intron  
 $H_o$**

| Granzyme | Interleukin | Killer_Cell | MHC_I | MHC_II | TLR | Other_IR |
|----------|-------------|-------------|-------|--------|-----|----------|
| ab       | ab          | a           | b     | ab     | ab  | ab       |

|   | Group       | $H_o$ mean | St. Deviation |
|---|-------------|------------|---------------|
| 1 | Granzyme    | 0.296      | 0.066         |
| 2 | Interleukin | 0.285      | 0.099         |
| 3 | Killer_Cell | 0.327      | 0.070         |
| 4 | MHC_I       | 0.173      | 0.098         |
| 5 | MHC_II      | 0.275      | 0.117         |
| 6 | TLR         | 0.269      | 0.095         |
| 7 | Other_IR    | 0.260      | 0.092         |

**Table S6. Observed ( $H_O$ ) and expected ( $H_E$ ) heterozygosity in genes, exons and introns in MERS-CoV positive (n = 36) and negative (n = 65) individuals.  $P$ -values of mean differences were calculated with Welch  $t$  test.**

|                             | <b>Genes_<math>H_O</math></b> | <b>Genes_<math>H_E</math></b> | <b>Exons_<math>H_O</math></b> | <b>Exons_<math>H_E</math></b> | <b>Introns_<math>H_O</math></b> | <b>Introns_<math>H_E</math></b> |
|-----------------------------|-------------------------------|-------------------------------|-------------------------------|-------------------------------|---------------------------------|---------------------------------|
| <b>Negative</b>             | 0.26                          | 0.28                          | 0.25                          | 0.27                          | 0.26                            | 0.29                            |
| <b>Positive</b>             | 0.27                          | 0.28                          | 0.27                          | 0.27                          | 0.28                            | 0.28                            |
| <b><math>p</math>-value</b> | 0.50                          | 0.79                          | 0.58                          | 0.96                          | 0.42                            | 0.78                            |
| <b>Welch <math>t</math></b> | -0.68                         | 0.27                          | -0.55                         | 0.05                          | -0.80                           | 0.28                            |
| <b>df</b>                   | 180.29                        | 183.97                        | 137.67                        | 139.77                        | 162.80                          | 165.79                          |

**Table S7. Linkage Disequilibrium-based haplotype (gene-set) test showing 20 genes with significant SNPs at  $p < 0.05$ .** Identified candidate genes *MAGOHB*, *HLA-A-24*-like, *HLA-DPBI*-like, *DNAH7* and *PTPN4* are highlighted in bold. *HLA-A-24*-like and *MAGOHB* were nominally significant ( $p < 0.05$ ) indicated with an asterisk. NSNP - Number of SNPs in set; NSIG - Total number of SNPs below  $p$ -value threshold; ISIG - Number of significant SNPs also passing LD-criterion; STAT - Average test statistic based on ISIG SNPs; EMP1 - Empirical set-based  $p$ -value; SNPs - positions of SNPs in the set.

| SET           | NSNP | NSIG | ISIG | EMP1   | SNPs                                            | Name                 | Description                                                                                  |
|---------------|------|------|------|--------|-------------------------------------------------|----------------------|----------------------------------------------------------------------------------------------|
| Cadr_00029272 | 12   | 5    | 1    | 0.008* | chr34:15362634                                  | <b>MAGOHB</b>        | Protein mago nashi homolog 2 (Bos taurus OX=9913)                                            |
| Cadr_00022140 | 112  | 14   | 2    | 0.031* | chr20:23100696   23100503                       | <b>HLA-A-24-like</b> | HLA class I histocompatibility antigen, A-24 alpha chain (Homo sapiens OX=9606)              |
| Cadr_00001327 | 32   | 1    | 1    | 0.032* | chr2:5565157                                    | <i>Suc1g1</i>        | Succinate--CoA ligase [ADP/GDP-forming] subunit alpha, mitochondrial (Mus musculus OX=10090) |
| Cadr_00022016 | 41   | 9    | 1    | 0.058  | chr20:20681619                                  | <b>HLA-DPBI-like</b> | HLA class II histocompatibility antigen, DP alpha chain (Homo sapiens OX=9606)               |
| Cadr_00028914 | 14   | 7    | 2    | 0.060  | chr33:12210072   12210460                       | <i>IL10RA</i>        | Interleukin-10 receptor subunit alpha (Homo sapiens OX=9606)                                 |
| Cadr_00011189 | 2    | 1    | 1    | 0.063  | chr9:33578918                                   | <i>HP</i>            | Haptoglobin (Sus scrofa OX=9823)                                                             |
| Cadr_00029993 | 12   | 2    | 2    | 0.085  | chr28:10593199   10591217                       | <i>NKL</i>           | Antimicrobial peptide NK-lysin (Fragment) (Sus scrofa OX=9823)                               |
| Cadr_00001384 | 10   | 1    | 1    | 0.093  | chr2:9866197                                    | <i>RNF175</i>        | RING finger protein 175 (Homo sapiens OX=9606)                                               |
| Cadr_00001385 | 10   | 1    | 1    | 0.093  | chr2:9866197                                    | <i>TLR2</i>          | Toll-like receptor 2 (Equus caballus OX=9796)                                                |
| Cadr_00017035 | 3    | 1    | 1    | 0.095  | chr12:24456808                                  | <i>IFNG</i>          | Interferon gamma (Camelus bactrianus OX=9837)                                                |
| Cadr_00020479 | 129  | 21   | 4    | 0.117  | chr:1723840747   23963829   23948208   23854332 | <b>DNAH7</b>         | Dynein heavy chain 7 axonemal (Homo sapiens OX=9607)                                         |
| Cadr_00006681 | 163  | 8    | 3    | 0.163  | chr5:8508361   8569590   8531515                | <b>PTPN4</b>         | Tyrosine-protein phosphatase non-receptor type 4 (Homo sapiens OX=9606)                      |
| Cadr_00022139 | 67   | 6    | 2    | 0.188  | chr20:23039666   23044464                       | <i>Patr-A</i>        | Patr class I histocompatibility antigen, A-126 alpha chain (Pan troglodytes OX=9598)         |
| Cadr_00022038 | 34   | 1    | 1    | 0.220  | chr20:21059892                                  | <i>Mamu-DRA</i>      | Mamu class II histocompatibility antigen, DR alpha chain (Macac mulata OX=9544)              |
| Cadr_00022027 | 28   | 1    | 1    | 0.260  | chr20:20837533                                  | <i>BoLA-DQB</i>      | BoLa class II histocompatibility antigen, DQB*0101 beta chain (Bos taurus OX=9913)           |
| Cadr_00029273 | 19   | 1    | 1    | 0.278  | chr34:15371765                                  | <i>Klra2</i>         | Killer cell lectin-like receptor 2 (Mus musculus OX=10090)                                   |

|               |     |    |   |       |                                        |                      |                                                                                 |
|---------------|-----|----|---|-------|----------------------------------------|----------------------|---------------------------------------------------------------------------------|
| Cadr_00022145 | 30  | 2  | 1 | 0.314 | chr20:23134732                         | <i>HLA-A-11-like</i> | HLA class I histocompatibility antigen, A-11 alpha chain (Homo sapiens OX=9606) |
| Cadr_00022026 | 72  | 3  | 1 | 0.345 | chr20:20830433                         | <i>HLA-DOB</i>       | HLA class II histocompatibility antigen, DO alpha chain (Homo sapiens OX=9606)  |
| Cadr_00030053 | 90  | 2  | 2 | 0.427 | Contig45:329958   334608               | <i>DDX58</i>         | Probable ATP-dependent RNA helicase DDX58 (Sus scrofa OX=9823)                  |
| Cadr_00002239 | 297 | 17 | 3 | 0.427 | chr2:113136710   113141381   113168889 | <i>CC2D2A</i>        | Coiled-coil and C2 domain-containing protein 2A (Homo sapiens OX=9606)          |
